# Supplementary material for: Spectroscopic observation of photo-induced metastable linkage isomers of coinage metal (Cu, Ag, Au) sulfur dioxide complexes
Source: Royal Society of Chemistry journal article supplement (doi:10.1039/c3cp53811g), 2013-10-29
Supplement: c3cp53811g.pdf [file c3cp53811g.pdf]

## Supporting Information

### Spectroscopic Observation of Photo-Induced Metastable Linkage Isomers of Coinage Metal (Cu, Ag, Au) Sulfur Dioxide Complexes

Xing Liu, Xuefeng Wang,\* Bing Xu, Lester Andrews\*

1. The B3LYP calculations of selected structures with the same basis set as described in the paper. The metastable structures are marked with asterisk. For each structure, the major infrared active modes are listed in the table, and the frequencies and intensities (in parentheses) are in  $\text{cm}^{-1}$  and  $\text{km mol}^{-1}$ .

#### 1.1 Triatomic molecules

Table 1S: Calculated frequencies for the  $M(\eta^1\text{-SO})$  ( ${}^2A''$ ) molecules (M = Cu, Ag, Au)

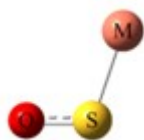

| 16-O        | 18-O                     | 16-O/34-S   | Mode assignment |
|-------------|--------------------------|-------------|-----------------|
|             | Cu( $\eta^1\text{-SO}$ ) |             |                 |
| 1037.4(158) | 997.8(146)               | 1027.4(155) | S=O str         |
|             | Ag( $\eta^1\text{-SO}$ ) |             |                 |
| 1048.4(201) | 1008.4(185)              | 1038.2(197) | S=O str         |
|             | Au( $\eta^1\text{-SO}$ ) |             |                 |
| 1032.6(226) | 993.2(208)               | 1022.6(222) | S=O str         |

Table 2S: Calculated frequencies for the  $M(\eta^1\text{-OS})$  ( ${}^2A''$ ) (M = Cu, Ag, Au)

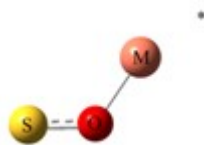

| 16-O       | 18-O                     | 16-O/34-S   | Mode assignment |
|------------|--------------------------|-------------|-----------------|
|            | Cu( $\eta^1\text{-OS}$ ) |             |                 |
| 864.8(426) | 832.5(390)               | 856.1(420)  | S=O str         |
|            | Ag( $\eta^1\text{-OS}$ ) |             |                 |
| 937.9(634) | 903.6(580)               | 928.0 (625) | S=O str         |
|            | Au( $\eta^1\text{-OS}$ ) |             |                 |
| 933.2(757) | 899.1(694)               | 923.5(746)  | S=O str         |

## 1.2 Binuclear molecules with one SO<sub>2</sub> ligand

Table 3S: Calculated frequencies for the M<sub>2</sub>(η<sup>1</sup>-SO<sub>2</sub>) (<sup>1</sup>A<sub>1</sub>) (M = Cu, Ag) and Au<sub>2</sub>(η<sup>1</sup>-SO<sub>2</sub>) (<sup>1</sup>A) molecules

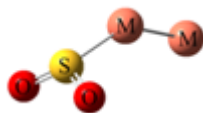

| 16-O        | 18-O                                               | 16-O/34-S    | Mode assignment |
|-------------|----------------------------------------------------|--------------|-----------------|
|             | Cu <sub>2</sub> (η <sup>1</sup> -SO <sub>2</sub> ) |              |                 |
| 513.8(66)   | 493.4 (59)                                         | 509.1(66)    | O=S=O bend      |
| 1137.3(324) | 1086.9(306)                                        | 1130.0 (314) | O=S=O str       |
| 1350.1(161) | 1306.1(150)                                        | 1333.1(157)  | O=S=O astr      |
|             | Ag <sub>2</sub> (η <sup>1</sup> -SO <sub>2</sub> ) |              |                 |
| 511.9(64)   | 491.0 (57)                                         | 507.5(64)    | O=S=O bend      |
| 1139.0(330) | 1088.4(312)                                        | 1131.8(320)  | O=S=O str       |
| 1350.4(163) | 1306.4(153)                                        | 1333.4(159)  | O=S=O astr      |
|             | Au <sub>2</sub> (η <sup>1</sup> -SO <sub>2</sub> ) |              |                 |
| 512.7(50)   | 491.6(45)                                          | 508.4(50)    | O=S=O bend      |
| 1134.2(341) | 1083.8(321)                                        | 1126.9(332)  | O=S=O str       |
| 1343.6(165) | 1299.8 (154)                                       | 1326.7(161)  | O=S=O astr      |

## 1.3 Mononuclear molecules with two SO<sub>2</sub> ligands

Table 4S: Calculated frequencies for the M(η<sup>1</sup>-SO<sub>2</sub>)<sub>2</sub>(<sup>2</sup>A<sub>1</sub>) (M = Cu, Ag) and Au(η<sup>1</sup>-SO<sub>2</sub>)<sub>2</sub> (<sup>2</sup>A) molecules

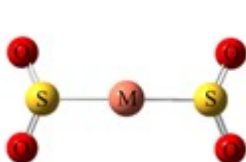

| 16-O         | 18-O                                              | 16-O/34-S    | Mode assignment |
|--------------|---------------------------------------------------|--------------|-----------------|
|              | Cu(η <sup>1</sup> -SO <sub>2</sub> ) <sub>2</sub> |              |                 |
| 501.9(92)    | 483.0 (78)                                        | 497.0(94)    | O=S=O bend      |
| 1069.4(1564) | 1021.7(1458)                                      | 1062.6(1528) | O=S=O str       |
| 1334.4(305)  | 1291.0(285)                                       | 1317.6 (298) | O=S=O astr      |
|              | Ag(η <sup>1</sup> -SO <sub>2</sub> ) <sub>2</sub> |              |                 |
| 499.0(117)   | 479.0 (102)                                       | 494.5(117)   | O=S=O bend      |
| 1080.4(1452) | 1031.7(1357)                                      | 1073.8(1417) | O=S=O str       |
| 1331.1(319)  | 1287.7(298)                                       | 1314.4(312)  | O=S=O astr      |
|              | Au(η <sup>1</sup> -SO <sub>2</sub> ) <sub>2</sub> |              |                 |
| 500.2(131)   | 479.9(114)                                        | 495.9(131)   | O=S=O bend      |
| 1081.6(1724) | 1032.9(1609)                                      | 1075.0(1683) | O=S=O str       |
| 1329.1(323)  | 1285.7 (301)                                      | 1312.4(315)  | O=S=O astr      |

Table 5S: Calculated frequencies for the  $M(\eta^1\text{-OSO})_2$  ( ${}^2A_u$ ) (M = Cu, Ag, Au) molecules

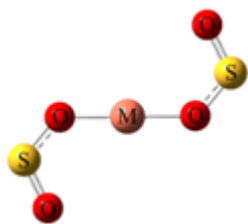

| 16-O        | 18-O                             | 16-O/34-S    | Mode assignment |
|-------------|----------------------------------|--------------|-----------------|
|             | $\text{Cu}(\eta^1\text{-OSO})_2$ |              |                 |
| 550.9(21)   | 525.5 (19)                       | 549.9(21)    | O=S=O bend      |
| 880.8(1925) | 843.5(1773)                      | 874.3(1892)  | O=S=O str       |
| 1220.3(793) | 1177.7(719)                      | 1206.5(786)  | O=S=O astr      |
|             | $\text{Ag}(\eta^1\text{-OSO})_2$ |              |                 |
| 521.4(29)   | 498.0 (20)                       | 518.1(32)    | O=S=O bend      |
| 887.3(2409) | 850.2(2219)                      | 880.5(2366)  | O=S=O str       |
| 1214.9(717) | 1173.0(649)                      | 1200.9(712)  | O=S=O astr      |
|             | $\text{Au}(\eta^1\text{-OSO})_2$ |              |                 |
| 509.7(91)   | 489.8(67)                        | 504.8(98)    | O=S=O bend      |
| 922.9(2623) | 882.5(2420)                      | 916.8(2574)  | O=S=O str       |
| 1186.4(423) | 1146.2 (390)                     | 1172.3.(416) | O=S=O astr      |

#### 1.4 Dimer species

Table 6S: Calculated frequencies for the  $M_2(\mu_2\text{-SO}_2)_2$  ( ${}^1A_g$ ) molecules (M= Cu, Ag, Au)

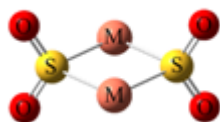

| 16-O        | 18-O                               | 16-O/34-S   | Mode assignment |
|-------------|------------------------------------|-------------|-----------------|
|             | $\text{Cu}_2(\mu_2\text{-SO}_2)_2$ |             |                 |
| 500.1(131)  | 480.0 (116)                        | 495.6(130)  | O=S=O bend      |
| 1095.5(599) | 1046.9(568)                        | 1088.4(580) | O=S=O str       |
| 1305.4(292) | 1262.3(270)                        | 1289.4(287) | O=S=O astr      |
|             | $\text{Ag}_2(\mu_2\text{-SO}_2)_2$ |             |                 |
| 502.8(128)  | 482.4 (113)                        | 498.3(128)  | O=S=O bend      |
| 1097.3(648) | 1048.8(613)                        | 1090.3(629) | O=S=O str       |
| 1307.6(290) | 1264.6(276)                        | 1291.4(293) | O=S=O astr      |
|             | $\text{Au}_2(\mu_2\text{-SO}_2)_2$ |             |                 |
| 499.8(118)  | 479.2(104)                         | 495.5 (119) | O=S=O bend      |
| 1085.0(726) | 1037.0(684)                        | 1077.9(706) | O=S=O str       |
| 1294.6(303) | 1251.8 (279)                       | 1278.6(297) | O=S=O astr      |

Table 7S: Calculated frequencies for the  $M_2(\eta^2-O_2S)_2$  ( ${}^3B_{1u}$ ) molecules (M = Cu, Ag, Au)

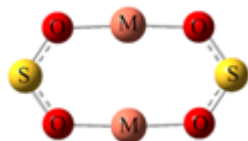

| 16-O                  | 18-O        | 16-O/34-S   | Mode assignment |
|-----------------------|-------------|-------------|-----------------|
| $Cu_2(\eta^2-O_2S)_2$ |             |             |                 |
| 532.0(67)             | 506.0 (61)  | 531.9(68)   | O=S=O bend      |
| 997.9(195)            | 956.4(180)  | 990.2(192)  | O=S=O str       |
| 1026.0(394)           | 990.4(366)  | 1014.2(386) | O=S=O astr      |
| $Ag_2(\eta^2-O_2S)_2$ |             |             |                 |
| 495.2 (63)            | 469.6 (54)  | 494.1(65)   | O=S=O bend      |
| 1001.2(238)           | 958.2(218)  | 992.6(236)  | O=S=O str       |
| 1024.2(474)           | 989.8(438)  | 1012.0(465) | O=S=O astr      |
| $Au_2(\eta^2-O_2S)_2$ |             |             |                 |
| 477.1(56)             | 453.4(46)   | 475.2 (58)  | O=S=O bend      |
| 1001.2(241)           | 959.2(220)  | 993.6(238)  | O=S=O str       |
| 1029.4(511)           | 994.9 (472) | 1016.9(502) | O=S=O astr      |

2. DFT calculations for the  $Cu(\eta^2-O_2S)(\eta^1-Ar)$  molecule with the same method as described in the paper. Frequencies and intensities (in parentheses) are in  $cm^{-1}$  and  $km\ mol^{-1}$ .

Table 8S: Calculated frequencies for the  $Cu(\eta^2-O_2S)(\eta^1-Ar)$  ( ${}^2B_1$ ) molecule based on the B3LYP functional.

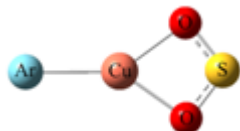

| 16-O       | 18-O       | 16-O/34-S  | Mode assignment                  |
|------------|------------|------------|----------------------------------|
| 6.0(0)     | 5.2(0)     | 5.3(0)     | $Cu(\eta^2-O_2S)(\eta^1-Ar)$ def |
| 47.1(0)    | 47.1(0)    | 46.8(0)    | Ar-Cu-S bend                     |
| 131.0(0)   | 130.3(0)   | 130.6(0)   | Cu-Ar str                        |
| 175.6(2)   | 166.2(2)   | 175.6(2)   | $Cu(\eta^2-O_2S)$ def            |
| 184.6(14)  | 177.4(13)  | 183.2(14)  | $Cu(\eta^2-O_2S)$ def            |
| 301.5(28)  | 298.3(28)  | 298.9(27)  | $Cu(\eta^2-O_2S)$ def            |
| 554.1(39)  | 527.4(33)  | 551.6(40)  | O=S=O bend                       |
| 983.0(75)  | 943.5(70)  | 974.7(74)  | O=S=O str                        |
| 998.6(202) | 963.7(187) | 987.3(199) | O=S=O astr                       |

Table 9S: Calculated frequencies for the  $\text{Cu}(\eta^2\text{-O}_2\text{S})(\eta^1\text{-Ar})$  ( ${}^2\text{A}''$ ) molecule based on the BPW91 functional.

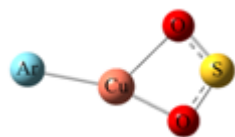

| 16-O       | 18-O       | 16-O/34-S  | Mode assignment                                              |
|------------|------------|------------|--------------------------------------------------------------|
| 42.6(1)    | 42.4(1)    | 42.4(1)    | $\text{Cu}(\eta^2\text{-O}_2\text{S})(\eta^1\text{-Ar})$ def |
| 61.0(0)    | 60.6(0)    | 60.6(0)    | $\text{Cu}(\eta^2\text{-O}_2\text{S})(\eta^1\text{-Ar})$ def |
| 118.0(10)  | 112.4(10)  | 117.9(10)  | $\text{Cu}(\eta^2\text{-O}_2\text{S})$ def                   |
| 157.8(0)   | 157.0(0)   | 157.4(0)   | Cu-Ar str                                                    |
| 159.0(10)  | 152.8(9)   | 158.0(10)  | $\text{Cu}(\eta^2\text{-O}_2\text{S})$ def                   |
| 330.9(10)  | 325.7(11)  | 328.0(9)   | $\text{Cu}(\eta^2\text{-O}_2\text{S})$ def                   |
| 531.0(26)  | 505.0(22)  | 529.4(27)  | O=S=O bend                                                   |
| 888.6(109) | 854.8(98)  | 880.0(109) | S=O str                                                      |
| 984.8(110) | 948.4(104) | 974.8(106) | S=O str                                                      |

3. The spectra for gold atom reactions with  $\text{SO}_2$  in solid neon with varied laser energy.

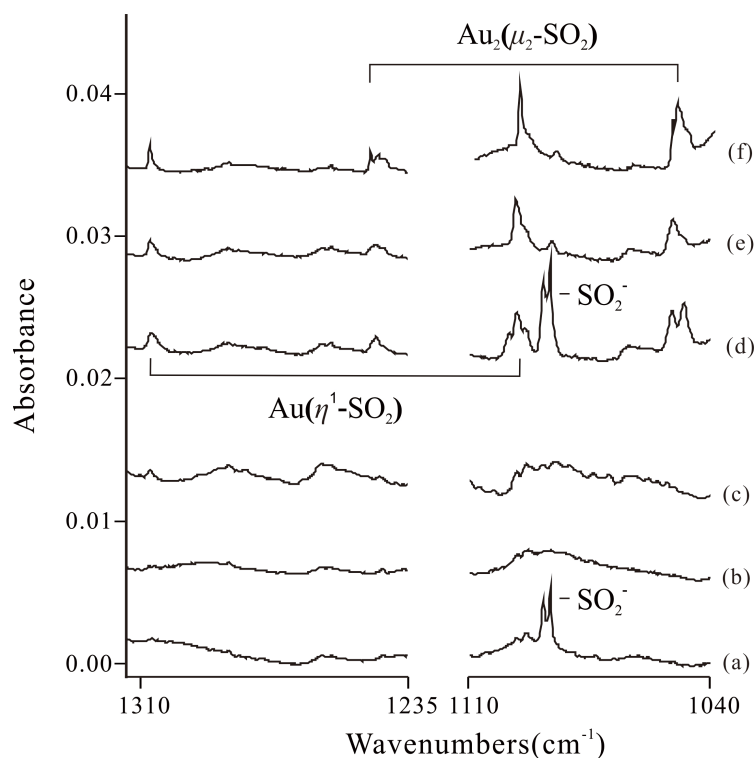

Fig.1S. (a) Au +  $\text{SO}_2$  deposition for 60 min(0.2% in Ne matrix gas,  $\sim 10\text{mJ/pulse}$ ); (b) after full-arc irradiation; (c) after annealing to 10 K; (d) Au +  $\text{SO}_2$  deposition for 60 min(0.2% in Ne matrix gas,  $\sim 20\text{mJ/pulse}$ ); (e) after full-arc irradiation; (f) after annealing to 10 K.
